# Supplementary material for: Clinical and Immunological Predictors of Hemorrhagic Fever with Renal Syndrome Outcome during the Early Phase
Source: MDPI journal article supplement (doi:10.3390/v14030595), 2022-03-14
Supplement: s1 [file s1]

## Supporting Information

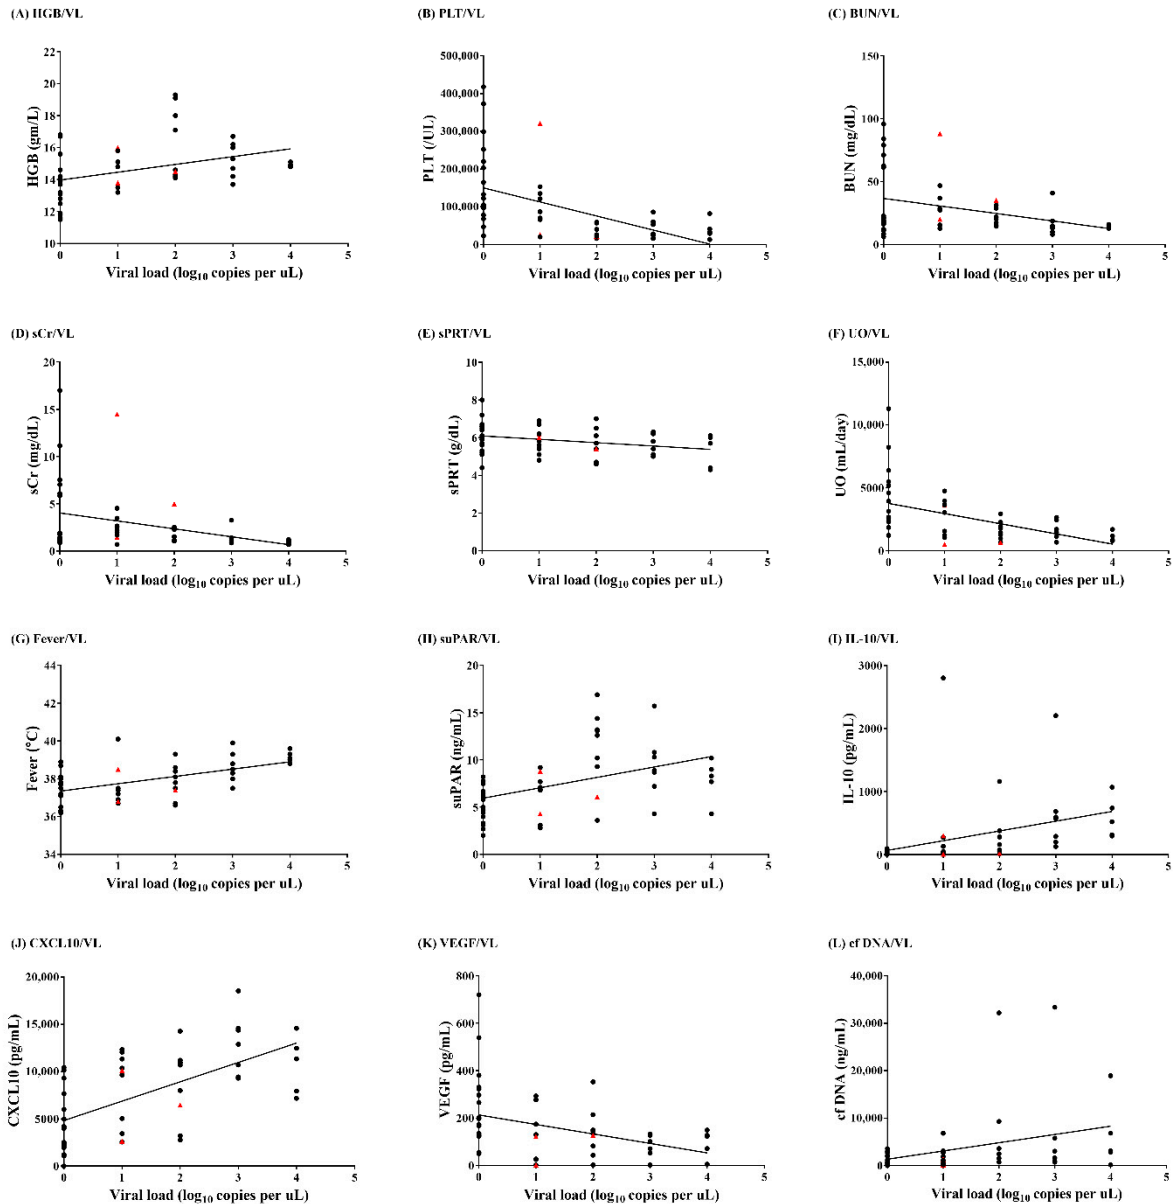

**Figure S1. Correlation between biomarkers and viral loads in patients with hemorrhagic fever with renal syndrome.** The concentrations of HGB ( $P = 0.0054$ ), PLT ( $P < 0.0001$ ), BUN ( $P = 0.0095$ ), sCr ( $P = 0.0168$ ), sPRT ( $P = 0.0257$ ), UO ( $P = 0.0003$ ), Fever ( $P < 0.0001$ ) correlated with the viral loads of Hantaan virus (HTNV) (A–G). Serum suPAR ( $P = 0.0008$ ), IL-10 ( $P = 0.0017$ ), CXCL10 ( $P < 0.0001$ ), VEGF ( $P = 0.0033$ ), and cfDNA ( $P = 0.0215$ ) showed a correlation with the viral loads (H–L). The correlation coefficient between the parameters is depicted by a straight line. Serum levels from patients who died ( $n=3$ ) during HTNV infection are shown in red triangles. Black circles indicate the measured 46 serum samples from 26 patients with HFRS. Cell-free DNA, cfDNA; BUN, blood urea nitrogen; HGB, hemoglobin; PLT, platelet; sCr, serum creatinine; sPRT, serum protein; UO, urine output; VL, viral load.

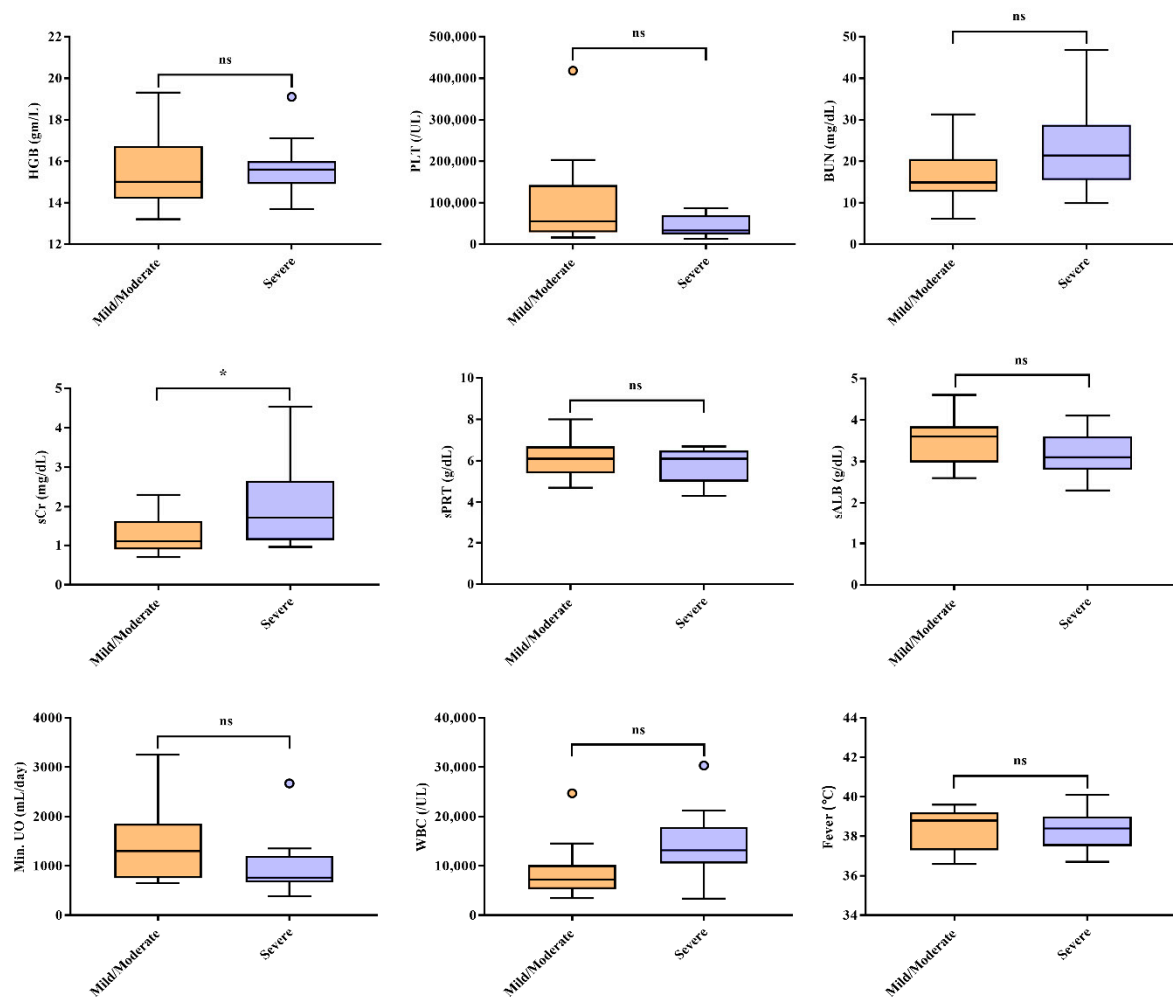

\*P < 0.05; \*\*\*P < 0.0002; \*\*\*\*P < 0.0001; ns: nonsignificant

**Figure S2. Levels of clinical and laboratory parameters for disease severity in patients with hemorrhagic fever with renal syndrome (HFRS).** Based on acute kidney injury (AKI) severity, patients with HFRS were classified into two types: mild/moderate disease (AKI stage 1 and 2), and severe disease (AKI stage 3). Box and whiskers were compared using unpaired Student's t-test. Box plots are presented as the mean±standard error. Whiskers represent maximum values excluding outliers, which are represented by dots. Comparison between two groups: \*P < 0.05; ns: nonsignificant. Fever information of 2 moderate patients was excluded in this study. BUN, blood urea nitrogen; HGB, hemoglobin; PLT, platelet; sCr, serum creatinine; sPRT, serum protein; sALB, serum albumin; UO, urine output; WBC, white blood counts.

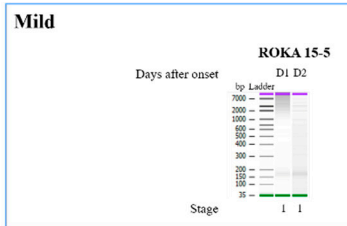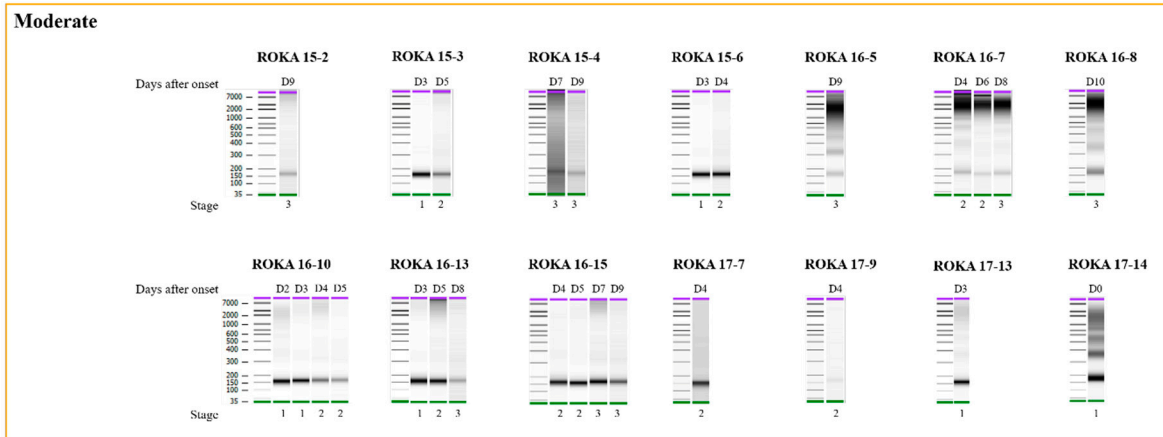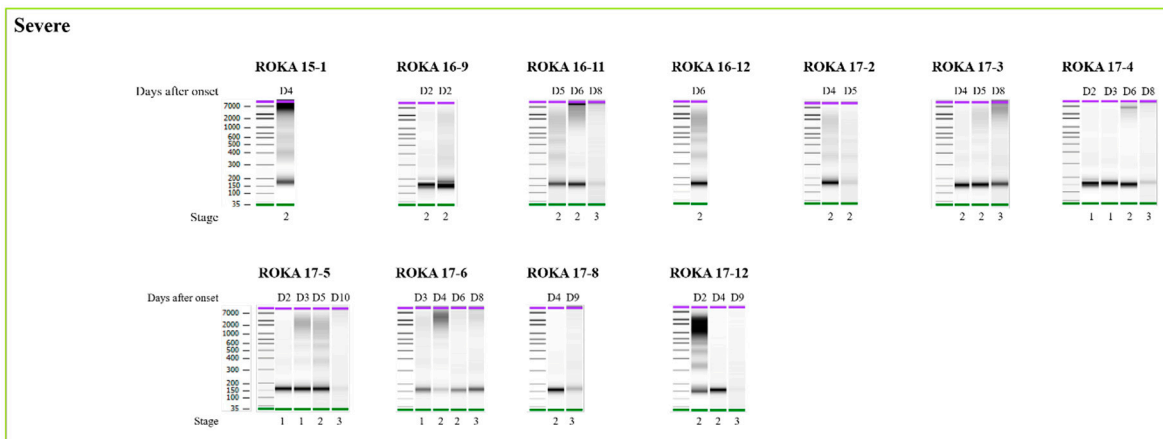

**Figure S3. Qualitative analysis of cell-free DNA in mild, moderate, and severe patients with hemorrhagic fever with renal syndrome (HFRS).** The low weight (150 bp to 200 bp) solid lines indicate the expected size DNA band. All patients with HFRS were classified into three stages: 1) hypotensive phase (days 1–3 after onset); 2) oliguric phase (days 2–6 after onset); and 3) diuretic phase (days 7–10 after onset).

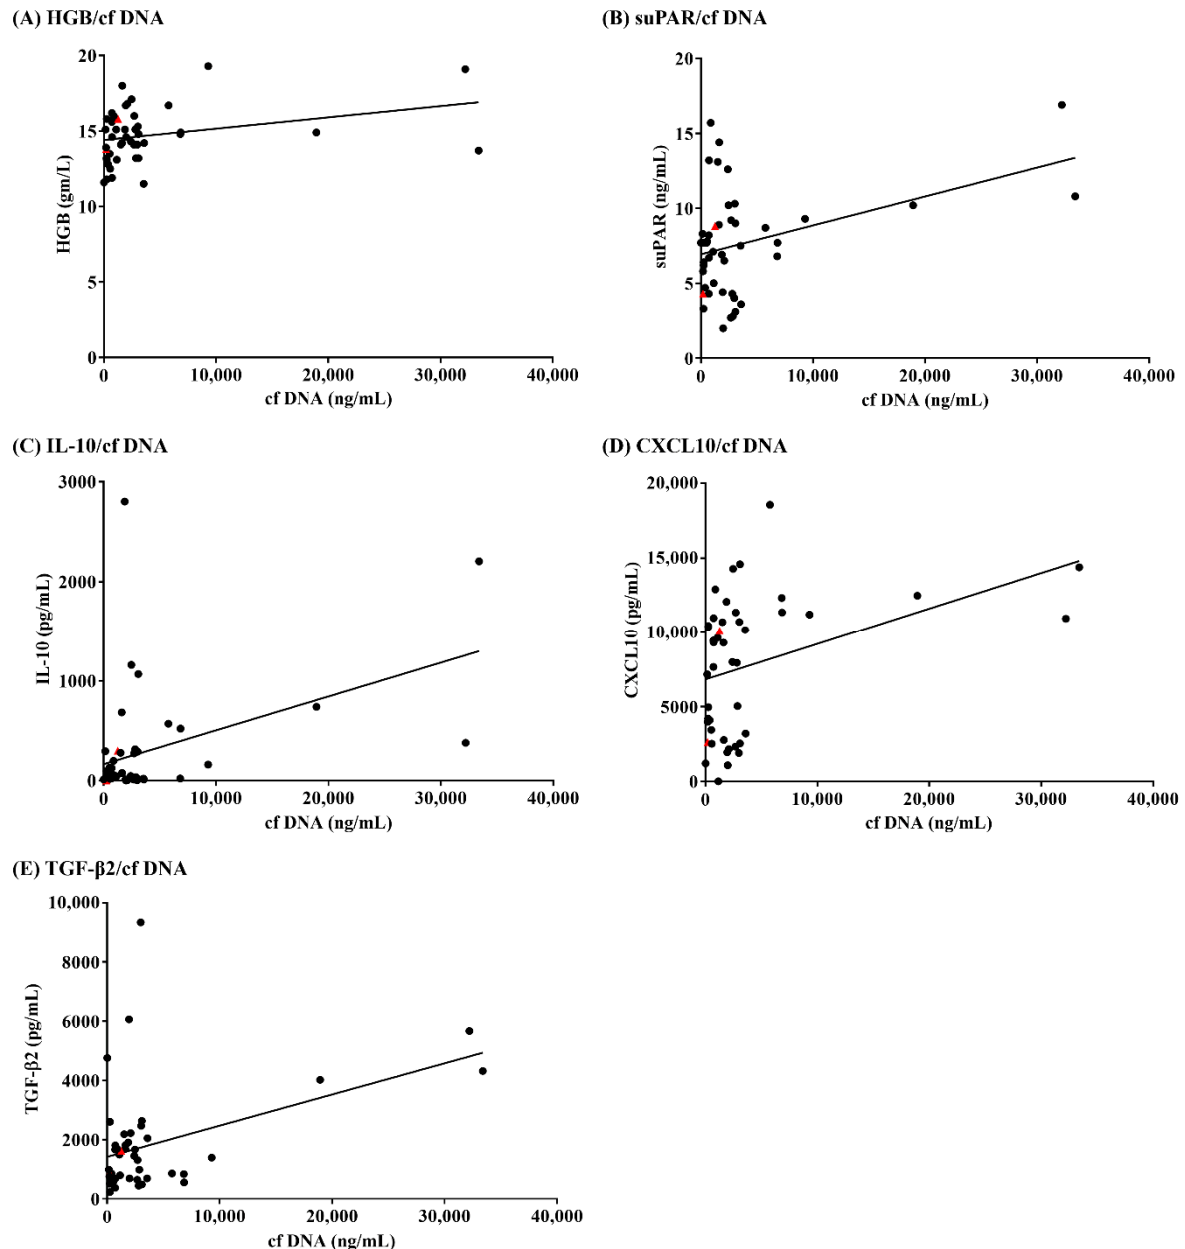

**Figure S4. Correlation between biomarkers and cell-free DNA (cfDNA) in patients with hemorrhagic fever with renal syndrome.** The serum concentrations of HGB ( $P = 0.0490$ ), suPAR ( $P = 0.0082$ ), IL-10 ( $P = 0.0031$ ), CXCL10 ( $P = 0.0129$ ), and TGF- $\beta$ 2 ( $P = 0.0043$ ) were correlated to the cfDNA levels obtained from patients with HTNV infection. The correlation coefficient between the parameters is depicted by a straight line. Serum levels from patients who died ( $n=2$ ) during Hantaan virus infection are shown in red triangles. Black circles indicate the measured 43 serum samples from 26 patients with HFRS. Abbreviations: HGB, hemoglobin.
